# Supplementary material for: Clinicopathologic and Molecular Characteristics of Pituitary Neuroendocrine Tumors (PitNETs) Treated with Extra-Pseudocapsule Resection and Their Clinical Implications: A Single-Center Experience with 274 Cases
Source: Research Square preprint supplement (doi:10.21203/rs.3.rs-8561070/v1), 2026-01-16
Supplement: Supplementary file 1 [file f37b691bde404f0263431960.docx]

Supplementary Figure 1


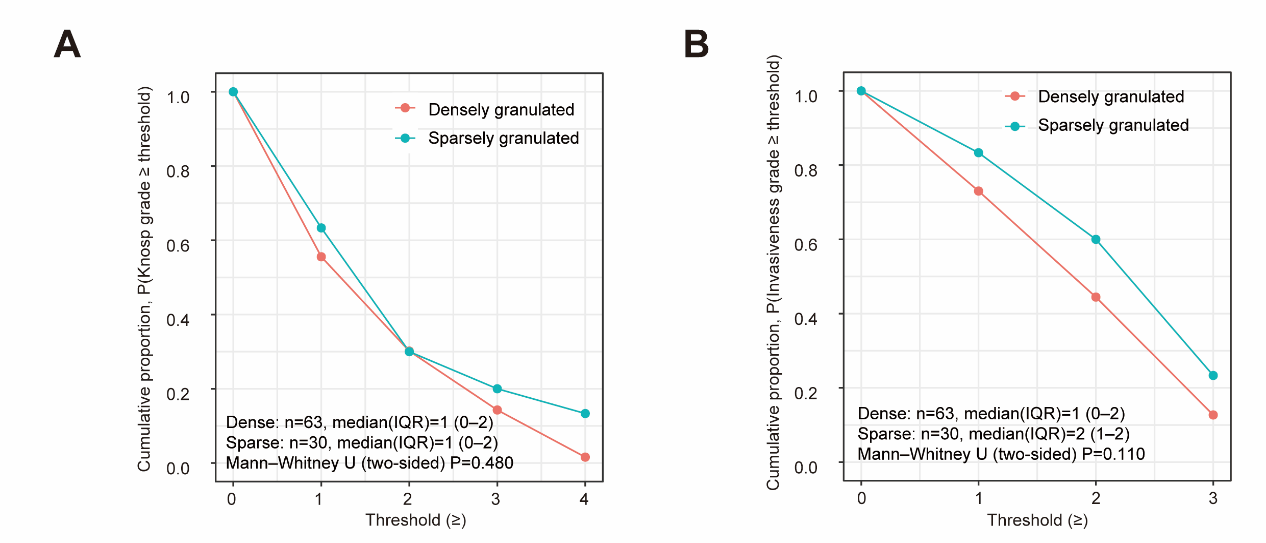


Supplementary Figure 1 Cumulative distribution curves stratified by granulation pattern within the PIT1-related cohort (PIT1-only, PIT1+SF1, PIT1+TPIT, and triple-lineage). (A) Knosp grade (0–4), plotted as cumulative proportions *P*(Knosp ≥ threshold). (B) Invasiveness grade (0–3), plotted as cumulative proportions *P*(grade ≥ threshold). Densely and sparsely granulated tumors are shown as separate curves. Overall distributions were compared using a two-sided Mann–Whitney U test (A: P=0.480; B: P=0.110). Sample size, median (IQR), and P values are provided in each panel.

Supplementary Figure 2


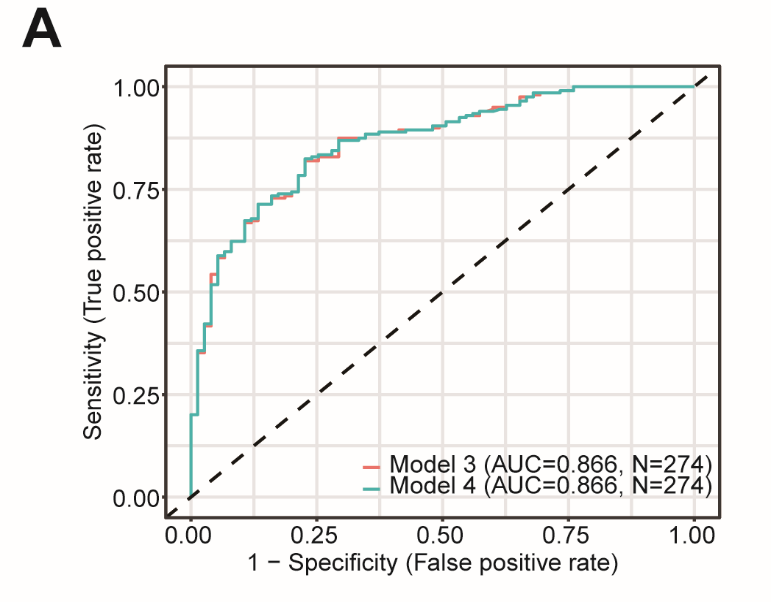


Supplementary Figure 2 Receiver operating characteristic (ROC) curves comparing Models 3 and 4 for predicting gross total resection (GTR; yes/no). Model 4 extended Model 3 by adding SOX2 status (positive vs negative). The diagonal dashed line indicates chance-level discrimination.

Supplementary Table 1. Baseline characteristics and clinical manifestations by hormone type

| Overall | Non-functioning | Gonadotroph | Plurihormonal-other | PRL | ACTH | GH-PRL | GH | TSH | Characteristic | P value (Monte Carlo) |
| --- | --- | --- | --- | --- | --- | --- | --- | --- | --- | --- |
| 274 | 87 | 64 | 38 | 30 | 27 | 17 | 7 | 4 | Total, N |  |
| 136 (49.6%) | 44 (50.6%) | 17 (26.6%) | 18 (47.4%) | 21 (70.0%) | 18 (66.7%) | 9 (52.9%) | 6 (85.7%) | 3 (75.0%) | Female, n (%) | <0.001 |
| 138 (50.4%) | 43 (49.4%) | 47 (73.4%) | 20 (52.6%) | 9 (30.0%) | 9 (33.3%) | 8 (47.1%) | 1 (14.3%) | 1 (25.0%) | Male, n (%) |  |
| 48.6 ± 13.6 | 51.2 ± 12.9 | 54.0 ± 11.2 | 50.1 ± 12.6 | 36.6 ± 13.9 | 45.6 ± 12.4 | 39.8 ± 12.2 | 48.4 ± 14.2 | 40.8 ± 9.0 | Age, years (mean ± SD) | <0.001 |
| 2.3 ± 1.0 | 2.8 ± 1.0 | 2.6 ± 0.9 | 2.0 ± 0.8 | 1.6 ± 0.9 | 1.8 ± 0.8 | 2.0 ± 1.0 | 1.5 ± 0.7 | 2.8 ± 0.8 | Tumor maximum diameter, cm (mean ± SD) | <0.001 |
|  |  |  |  |  |  |  |  |  | Clinical presentation |  |
| 98 (35.8%) | 40 (46.0%) | 20 (31.2%) | 11 (28.9%) | 7 (23.3%) | 6 (22.2%) | 8 (47.1%) | 4 (57.1%) | 2 (50.0%) | Headache, n (%) | 0.084 |
| 45 (16.4%) | 16 (18.4%) | 12 (18.8%) | 5 (13.2%) | 2 (6.7%) | 8 (29.6%) | 1 (5.9%) | 1 (14.3%) | 0 (0.0%) | Dizziness, n (%) | 0.272 |
| 10 (3.6%) | 6 (6.9%) | 3 (4.7%) | 1 (2.6%) | 0 (0.0%) | 0 (0.0%) | 0 (0.0%) | 0 (0.0%) | 0 (0.0%) | Nausea/vomiting, n (%) | 0.497 |
| 104 (38.0%) | 43 (49.4%) | 31 (48.4%) | 11 (28.9%) | 5 (16.7%) | 7 (25.9%) | 3 (17.6%) | 2 (28.6%) | 2 (50.0%) | Decreased visual acuity, n (%) | 0.004 |
| 14 (5.1%) | 4 (4.6%) | 1 (1.6%) | 2 (5.3%) | 2 (6.7%) | 4 (14.8%) | 1 (5.9%) | 0 (0.0%) | 0 (0.0%) | Blurred vision, n (%) | 0.332 |
|  |  |  |  |  |  |  |  |  | Physical examination |  |
| 52 (19.0%) | 25 (28.7%) | 18 (28.1%) | 3 (7.9%) | 1 (3.3%) | 1 (3.7%) | 3 (17.6%) | 0 (0.0%) | 1 (25.0%) | Visual field defect, n (%) | 0.004 |
| 6 (2.2%) | 3 (3.4%) | 1 (1.6%) | 1 (2.6%) | 1 (3.3%) | 0 (0.0%) | 0 (0.0%) | 0 (0.0%) | 0 (0.0%) | Ptosis, n (%) | 0.946 |
| 26 (9.5%) | 1 (1.1%) | 0 (0.0%) | 7 (18.4%) | 3 (10.0%) | 1 (3.7%) | 9 (52.9%) | 5 (71.4%) | 0 (0.0%) | Acral enlargement, n (%) | <0.001 |
| 29 (10.6%) | 2 (2.3%) | 0 (0.0%) | 7 (18.4%) | 3 (10.0%) | 1 (3.7%) | 10 (58.8%) | 6 (85.7%) | 0 (0.0%) | Coarsening of facial features, n (%) | <0.001 |
| 9 (3.3%) | 0 (0.0%) | 0 (0.0%) | 0 (0.0%) | 0 (0.0%) | 8 (29.6%) | 1 (5.9%) | 0 (0.0%) | 0 (0.0%) | Central obesity, n (%) | <0.001 |
| 42 (15.3%) | 9 (10.3%) | 3 (4.7%) | 7 (18.4%) | 14 (46.7%) | 2 (7.4%) | 4 (23.5%) | 2 (28.6%) | 1 (25.0%) | Menstrual irregularity/amenorrhea, n (%) | <0.001 |
| 6 (2.2%) | 1 (1.1%) | 0 (0.0%) | 1 (2.6%) | 3 (10.0%) | 1 (3.7%) | 0 (0.0%) | 0 (0.0%) | 0 (0.0%) | Galactorrhea, n (%) | 0.156 |
| 3 (1.1%) | 0 (0.0%) | 0 (0.0%) | 0 (0.0%) | 1 (3.3%) | 0 (0.0%) | 1 (5.9%) | 0 (0.0%) | 1 (25.0%) | Sexual dysfunction, n (%) | 0.008 |

Note.

Baseline characteristics, tumor maximum diameter (cm), symptoms, and examination findings are compared across hormone-defined subtypes. Continuous variables are presented as mean ± SD and categorical variables as n (%). P values were obtained using Monte Carlo permutation tests (two-sided; 10,000 permutations) for overall comparisons across hormone subtypes.

Supplementary table 2. Distribution of Knosp grade across invasiveness grades

| Characteristic | Grade 0 | Grade 1 | Grade 2 | Grade 3 |
| --- | --- | --- | --- | --- |
| Number of cases, N | 50 | 85 | 89 | 50 |
| Knosp grade = 0, n (%) | 36 (72.0%) | 35 (41.2%) | 19 (21.3%) | 0 (0.0%) |
| Knosp grade = 1, n (%) | 12 (24.0%) | 41 (48.2%) | 34 (38.2%) | 0 (0.0%) |
| Knosp grade = 2, n (%) | 2 (4.0%) | 7 (8.2%) | 21 (23.6%) | 18 (36.0%) |
| Knosp grade = 3, n (%) | 0 (0.0%) | 2 (2.4%) | 9 (10.1%) | 21 (42.0%) |
| Knosp grade = 4, n (%) | 0 (0.0%) | 0 (0.0%) | 6 (6.7%) | 11 (22.0%) |

Note.

Knosp grade (0–4) is cross-tabulated by invasiveness grade (0–3). Values are presented as n (% within invasiveness grade).

Supplementary table 3. Tumor maximum diameter across invasiveness grades, overall and stratified by Knosp grade

| Characteristic | Grade 0 | Grade 1 | Grade 2 | Grade 3 |
| --- | --- | --- | --- | --- |
| Tumor maximum diameter (cm), mean ± SD | 1.6 ± 0.6 | 2.0 ± 0.8 | 2.5 ± 1.0 | 3.2 ± 1.0 |
| Knosp grade = 0 | 1.4 ± 0.6 | 1.6 ± 0.7 | 2.2 ± 1.0 | NA |
| Knosp grade = 1 | 2.0 ± 0.5 | 2.3 ± 0.8 | 2.3 ± 0.9 | NA |
| Knosp grade = 2 | 1.9 ± 0.1 | 2.2 ± 0.7 | 2.4 ± 0.6 | 2.9 ± 0.8 |
| Knosp grade = 3 | NA | 2.8 ± 1.0 | 3.2 ± 0.7 | 3.1 ± 1.0 |
| Knosp grade = 4 | NA | NA | 4.3 ± 0.6 | 3.9 ± 1.0 |

Note.

Tumor maximum diameter (cm) is presented as mean ± SD by invasiveness grade (0–3), overall and within each Knosp grade stratum. “NA” indicates that no tumors were observed in the corresponding stratum.

Supplementary Table 4. Biomarkers and invasiveness indices across lineage types.

| Variable | Level | Overall | SF1-only (n=95) | PIT1-only (n=60) | TPIT-only (n=53) | PIT1+SF1 (n=32) | TF-negative (n=22) | SF1+TPIT (n=7) | PIT1+TPIT (n=3) | Triple (n=2) | P value (MC χ²) |
| --- | --- | --- | --- | --- | --- | --- | --- | --- | --- | --- | --- |
| Invasiveness grade | Invasiveness grade ≥2 | 139 (50.7%) | 52 (54.7%) | 29 (48.3%) | 22 (41.5%) | 18 (56.2%) | 12 (54.5%) | 4 (57.1%) | 2 (66.7%) | 0 (0.0%) | 0.628 |
|  | Invasiveness grade <2 | 135 (49.3%) | 43 (45.3%) | 31 (51.7%) | 31 (58.5%) | 14 (43.8%) | 10 (45.5%) | 3 (42.9%) | 1 (33.3%) | 2 (100.0%) |  |
| Knosp | Knosp ≥3 | 49 (17.9%) | 15 (15.8%) | 10 (16.7%) | 8 (15.1%) | 7 (21.9%) | 8 (36.4%) | 1 (14.3%) | 0 (0.0%) | 0 (0.0%) | 0.393 |
|  | Knosp <3 | 225 (82.1%) | 80 (84.2%) | 50 (83.3%) | 45 (84.9%) | 25 (78.1%) | 14 (63.6%) | 6 (85.7%) | 3 (100.0%) | 2 (100.0%) |  |

Note.

The proportions of tumors with invasiveness grade ≥2 (vs <2) and with Knosp grade ≥3 (vs <3) are summarized across TF-defined lineage categories. Values are presented as n (% within column). P values were calculated using a Monte Carlo χ² test (two-sided; 10,000 permutations).

Supplementary Table 5. Distribution of invasiveness grades across hormone types

| Hormone type | Grade 0 | Grade 1 | Grade 2 | Grade 3 | P value (Monte Carlo) |
| --- | --- | --- | --- | --- | --- |
| Non-functioning | 10 (11.5%) | 32 (36.8%) | 29 (33.3%) | 16 (18.4%) |  |
| Gonadotroph | 8 (12.5%) | 19 (29.7%) | 23 (35.9%) | 14 (21.9%) |  |
| Plurihormonal-other | 9 (23.7%) | 10 (26.3%) | 12 (31.6%) | 7 (18.4%) |  |
| PRL | 11 (36.7%) | 11 (36.7%) | 5 (16.7%) | 3 (10.0%) |  |
| ACTH | 9 (33.3%) | 9 (33.3%) | 6 (22.2%) | 3 (11.1%) | 0.053 |
| GH-PRL | 0 (0.0%) | 2 (11.8%) | 10 (58.8%) | 5 (29.4%) |  |
| GH | 2 (28.6%) | 1 (14.3%) | 3 (42.9%) | 1 (14.3%) |  |
| TSH | 1 (25.0%) | 1 (25.0%) | 1 (25.0%) | 1 (25.0%) |  |

Note.

The distribution of invasiveness grade (0–3) is shown for each hormone-defined subtype. Values are presented as n (row %). P values were calculated using a Monte Carlo χ² test (two-sided; 10,000 permutations).

Supplementary Table 6. Association of biomarkers and intraoperative/imaging features with invasiveness outcomes. Values are shown as n (% within level).

| Variable | Level | Invasiveness grade ≥2 |  |  | Knosp ≥3 |  |  | Surgical invasion |  |  | Dural invasion (pathology) |  |  | Radiological invasion |
| --- | --- | --- | --- | --- | --- | --- | --- | --- | --- | --- | --- | --- | --- | --- |
|  |  | Invasion n (%) | Non-invasion n (%) | P value | Invasion n (%) | Non-invasion n (%) | P value | Invasion n (%) | Non-invasion n (%) | P value | Invasion n (%) | Non-invasion n (%) | P value | Invasion n (%) |
| SOX2 | SOX2 negative | 118 (50.9%) | 114 (49.1%) | 1.000 | 39 (16.8%) | 193 (83.2%) | 0.278 | 127 (54.7%) | 105 (45.3%) | 1.000 | 152 (65.5%) | 80 (34.5%) | 0.484 | 69 (29.7%) |
|  | SOX2 positive | 21 (50.0%) | 21 (50.0%) |  | 10 (23.8%) | 32 (76.2%) |  | 23 (54.8%) | 19 (45.2%) |  | 30 (71.4%) | 12 (28.6%) |  | 12 (28.6%) |
| Ki-67 | Ki-67 < 3 | 81 (44.0%) | 103 (56.0%) | 0.002 | 23 (12.5%) | 161 (87.5%) | 0.001 | 89 (48.4%) | 95 (51.6%) | 0.003 | 119 (64.7%) | 65 (35.3%) | 0.416 | 43 (23.4%) |
|  | Ki-67 ≥ 3 | 58 (64.4%) | 32 (35.6%) |  | 26 (28.9%) | 64 (71.1%) |  | 61 (67.8%) | 29 (32.2%) |  | 63 (70.0%) | 27 (30.0%) |  | 38 (42.2%) |
| Pseudocapsule | No capsule | 38 (60.3%) | 25 (39.7%) | 0.087 | 18 (28.6%) | 45 (71.4%) | 0.015 | 44 (69.8%) | 19 (30.2%) | 0.006 | 37 (58.7%) | 26 (41.3%) | 0.171 | 22 (34.9%) |
|  | Partial/Intact capsule | 101 (47.9%) | 110 (52.1%) |  | 31 (14.7%) | 180 (85.3%) |  | 106 (50.2%) | 105 (49.8%) |  | 145 (68.7%) | 66 (31.3%) |  | 59 (28.0%) |
| Texture | Hard texture | 17 (42.5%) | 23 (57.5%) | 0.306 | 8 (20.0%) | 32 (80.0%) | 0.661 | 18 (45.0%) | 22 (55.0%) | 0.229 | 20 (50.0%) | 20 (50.0%) | 0.029 | 12 (30.0%) |
|  | Soft texture | 122 (52.1%) | 112 (47.9%) |  | 41 (17.5%) | 193 (82.5%) |  | 132 (56.4%) | 102 (43.6%) |  | 162 (69.2%) | 72 (30.8%) |  | 69 (29.5%) |
| Vascularity | Poor vascularity | 119 (49.2%) | 123 (50.8%) | 0.189 | 37 (15.3%) | 205 (84.7%) | 0.005 | 126 (52.1%) | 116 (47.9%) | 0.015 | 162 (66.9%) | 80 (33.1%) | 0.691 | 65 (26.9%) |
|  | Rich vascularity | 20 (62.5%) | 12 (37.5%) |  | 12 (37.5%) | 20 (62.5%) |  | 24 (75.0%) | 8 (25.0%) |  | 20 (62.5%) | 12 (37.5%) |  | 16 (50.0%) |
| P53 | Mutant (1) | 13 (72.2%) | 5 (27.8%) | 0.086 | 6 (33.3%) | 12 (66.7%) | 0.105 | 13 (72.2%) | 5 (27.8%) | 0.146 | 13 (72.2%) | 5 (27.8%) | 0.797 | 8 (44.4%) |
|  | Wild-type (0) | 126 (49.2%) | 130 (50.8%) |  | 43 (16.8%) | 213 (83.2%) |  | 137 (53.5%) | 119 (46.5%) |  | 169 (66.0%) | 87 (34.0%) |  | 73 (28.5%) |

Note.

Associations of biomarkers (SOX2, Ki-67 category, P53 status) and tumor features (pseudocapsule integrity, texture, vascularity) with invasiveness outcomes are presented. Outcomes include invasiveness grade ≥2 (vs <2), Knosp grade ≥3 (vs <3), surgical invasion, dural invasion (pathology), and radiological invasion. For each factor level, values are shown as invasion n (%) and non-invasion n (%), with percentages calculated within the factor level. P values were calculated using two-sided Fisher’s exact tests for 2×2 comparisons.

Supplementary Table 7. Biomarkers and invasiveness indices across hormone types.

| Variable | Level | Overall | Non-functioning (n=87) | Gonadotroph (n=64) | Plurihormonal-other (n=38) | PRL (n=30) | ACTH (n=27) | GH-PRL (n=17) | GH (n=7) | TSH (n=4) | P value (MC χ²) |
| --- | --- | --- | --- | --- | --- | --- | --- | --- | --- | --- | --- |
| SOX2 | SOX2 negative | 232 (84.7%) | 79 (90.8%) | 53 (82.8%) | 30 (78.9%) | 28 (93.3%) | 21 (77.8%) | 11 (64.7%) | 6 (85.7%) | 4 (100.0%) | 0.093 |
|  | SOX2 positive | 42 (15.3%) | 8 (9.2%) | 11 (17.2%) | 8 (21.1%) | 2 (6.7%) | 6 (22.2%) | 6 (35.3%) | 1 (14.3%) | 0 (0.0%) |  |
| Capsule | No capsule | 63 (23.0%) | 18 (20.7%) | 10 (15.6%) | 10 (26.3%) | 9 (30.0%) | 10 (37.0%) | 3 (17.6%) | 3 (42.9%) | 0 (0.0%) | 0.212 |
|  | Partial/Intact capsule | 211 (77.0%) | 69 (79.3%) | 54 (84.4%) | 28 (73.7%) | 21 (70.0%) | 17 (63.0%) | 14 (82.4%) | 4 (57.1%) | 4 (100.0%) |  |
| Texture | Hard texture | 40 (14.6%) | 15 (17.2%) | 4 (6.2%) | 5 (13.2%) | 10 (33.3%) | 3 (11.1%) | 2 (11.8%) | 0 (0.0%) | 1 (25.0%) | 0.051 |
|  | Soft texture | 234 (85.4%) | 72 (82.8%) | 60 (93.8%) | 33 (86.8%) | 20 (66.7%) | 24 (88.9%) | 15 (88.2%) | 7 (100.0%) | 3 (75.0%) |  |
| Vascular | Poor vascularity | 242 (88.3%) | 69 (79.3%) | 57 (89.1%) | 36 (94.7%) | 29 (96.7%) | 23 (85.2%) | 17 (100.0%) | 7 (100.0%) | 4 (100.0%) | 0.050 |
|  | Rich vascularity | 32 (11.7%) | 18 (20.7%) | 7 (10.9%) | 2 (5.3%) | 1 (3.3%) | 4 (14.8%) | 0 (0.0%) | 0 (0.0%) | 0 (0.0%) |  |
| Ki-67 | Ki-67 < 3 | 184 (67.2%) | 55 (63.2%) | 45 (70.3%) | 28 (73.7%) | 20 (66.7%) | 18 (66.7%) | 10 (58.8%) | 5 (71.4%) | 3 (75.0%) | 0.943 |
|  | Ki-67 ≥ 3 | 90 (32.8%) | 32 (36.8%) | 19 (29.7%) | 10 (26.3%) | 10 (33.3%) | 9 (33.3%) | 7 (41.2%) | 2 (28.6%) | 1 (25.0%) |  |
| P53 | Mutant (1) | 18 (6.6%) | 6 (6.9%) | 5 (7.8%) | 1 (2.6%) | 1 (3.3%) | 2 (7.4%) | 2 (11.8%) | 1 (14.3%) | 0 (0.0%) | 0.854 |
|  | Wild-type (0) | 256 (93.4%) | 81 (93.1%) | 59 (92.2%) | 37 (97.4%) | 29 (96.7%) | 25 (92.6%) | 15 (88.2%) | 6 (85.7%) | 4 (100.0%) |  |
| Invasiveness grade | Invasiveness grade≥2 | 139 (50.7%) | 45 (51.7%) | 37 (57.8%) | 19 (50.0%) | 8 (26.7%) | 9 (33.3%) | 15 (88.2%) | 4 (57.1%) | 2 (50.0%) | 0.002 |
|  | Invasiveness grade<2 | 135 (49.3%) | 42 (48.3%) | 27 (42.2%) | 19 (50.0%) | 22 (73.3%) | 18 (66.7%) | 2 (11.8%) | 3 (42.9%) | 2 (50.0%) |  |
| Knosp | Knosp≥3 | 49 (17.9%) | 17 (19.5%) | 12 (18.8%) | 5 (13.2%) | 6 (20.0%) | 2 (7.4%) | 5 (29.4%) | 1 (14.3%) | 1 (25.0%) | 0.717 |
|  | Knosp<3 | 225 (82.1%) | 70 (80.5%) | 52 (81.2%) | 33 (86.8%) | 24 (80.0%) | 25 (92.6%) | 12 (70.6%) | 6 (85.7%) | 3 (75.0%) |  |

Note.

SOX2 status, pseudocapsule integrity, tumor texture, vascularity, Ki-67 category, P53 status, and invasiveness indices (invasiveness grade ≥2; Knosp grade ≥3) are summarized across hormone-defined subtypes. Values are presented as n (% within column). P values were calculated using a Monte Carlo χ² test (two-sided; 10,000 permutations).

Supplementary Table 8. Biomarkers and invasiveness indices across lineage types (PIT1 split into PIT1-GH-PRL and PIT1-only).

| Variable | Level | Overall | SF1-only | PIT1-GH-PRL | PIT1-only | TPIT-only | PIT1+SF1 | TF-negative | SF1+TPIT | PIT1+TPIT | Triple | P value (MC χ²) |
| --- | --- | --- | --- | --- | --- | --- | --- | --- | --- | --- | --- | --- |
| SOX2 | SOX2 negative | 232 (84.7%) | 81 (85.3%) | 7 (58.3%) | 45 (93.8%) | 44 (83.0%) | 26 (81.2%) | 20 (90.9%) | 5 (71.4%) | 3 (100.0%) | 1 (50.0%) | 0.089 |
|  | SOX2 positive | 42 (15.3%) | 14 (14.7%) | 5 (41.7%) | 3 (6.2%) | 9 (17.0%) | 6 (18.8%) | 2 (9.1%) | 2 (28.6%) | 0 (0.0%) | 1 (50.0%) |  |
| Capsule | No capsule | 63 (23.0%) | 18 (18.9%) | 3 (25.0%) | 11 (22.9%) | 17 (32.1%) | 7 (21.9%) | 6 (27.3%) | 0 (0.0%) | 0 (0.0%) | 1 (50.0%) | 0.492 |
|  | Partial/Intact capsule | 211 (77.0%) | 77 (81.1%) | 9 (75.0%) | 37 (77.1%) | 36 (67.9%) | 25 (78.1%) | 16 (72.7%) | 7 (100.0%) | 3 (100.0%) | 1 (50.0%) |  |
| Texture | Hard texture | 40 (14.6%) | 11 (11.6%) | 1 (8.3%) | 12 (25.0%) | 4 (7.5%) | 6 (18.8%) | 5 (22.7%) | 0 (0.0%) | 0 (0.0%) | 1 (50.0%) | 0.130 |
|  | Soft texture | 234 (85.4%) | 84 (88.4%) | 11 (91.7%) | 36 (75.0%) | 49 (92.5%) | 26 (81.2%) | 17 (77.3%) | 7 (100.0%) | 3 (100.0%) | 1 (50.0%) |  |
| Vascular | Poor vascularity | 242 (88.3%) | 83 (87.4%) | 12 (100.0%) | 47 (97.9%) | 44 (83.0%) | 32 (100.0%) | 15 (68.2%) | 4 (57.1%) | 3 (100.0%) | 2 (100.0%) | 0.004 |
|  | Rich vascularity | 32 (11.7%) | 12 (12.6%) | 0 (0.0%) | 1 (2.1%) | 9 (17.0%) | 0 (0.0%) | 7 (31.8%) | 3 (42.9%) | 0 (0.0%) | 0 (0.0%) |  |
| Ki-67 | Ki-67 < 3 | 184 (67.2%) | 69 (72.6%) | 7 (58.3%) | 32 (66.7%) | 34 (64.2%) | 23 (71.9%) | 12 (54.5%) | 4 (57.1%) | 2 (66.7%) | 1 (50.0%) | 0.837 |
|  | Ki-67 ≥ 3 | 90 (32.8%) | 26 (27.4%) | 5 (41.7%) | 16 (33.3%) | 19 (35.8%) | 9 (28.1%) | 10 (45.5%) | 3 (42.9%) | 1 (33.3%) | 1 (50.0%) |  |
| P53 | Mutant (1) | 18 (6.6%) | 7 (7.4%) | 2 (16.7%) | 0 (0.0%) | 3 (5.7%) | 2 (6.2%) | 3 (13.6%) | 0 (0.0%) | 1 (33.3%) | 0 (0.0%) | 0.178 |
|  | Wild-type (0) | 256 (93.4%) | 88 (92.6%) | 10 (83.3%) | 48 (100.0%) | 50 (94.3%) | 30 (93.8%) | 19 (86.4%) | 7 (100.0%) | 2 (66.7%) | 2 (100.0%) |  |
| Invasiveness grade | Invasiveness grade ≥2 | 139 (50.7%) | 52 (54.7%) | 11 (91.7%) | 18 (37.5%) | 22 (41.5%) | 18 (56.2%) | 12 (54.5%) | 4 (57.1%) | 2 (66.7%) | 0 (0.0%) | 0.023 |
|  | Invasiveness grade <2 | 135 (49.3%) | 43 (45.3%) | 1 (8.3%) | 30 (62.5%) | 31 (58.5%) | 14 (43.8%) | 10 (45.5%) | 3 (42.9%) | 1 (33.3%) | 2 (100.0%) |  |
| Knosp | Knosp ≥3 | 49 (17.9%) | 15 (15.8%) | 4 (33.3%) | 6 (12.5%) | 8 (15.1%) | 7 (21.9%) | 8 (36.4%) | 1 (14.3%) | 0 (0.0%) | 0 (0.0%) | 0.246 |
|  | Knosp <3 | 225 (82.1%) | 80 (84.2%) | 8 (66.7%) | 42 (87.5%) | 45 (84.9%) | 25 (78.1%) | 14 (63.6%) | 6 (85.7%) | 3 (100.0%) | 2 (100.0%) |  |

Note.

The set of biomarkers, tumor features, and invasiveness indices are summarized across TF-defined lineage categories, with PIT1 tumors further stratified into PIT1–GH–PRL and PIT1-only. Values are presented as n (% within column). P values were calculated using a Monte Carlo χ² test (two-sided; 10,000 permutations).

Supplementary Table 9. Pre- and post-operative hormone levels by SOX2 status

| Hormone | SOX2− | SOX2+ | P value | Statistical test |
| --- | --- | --- | --- | --- |
| Preoperative thyroid-stimulating hormone (TSH) | 2.08 (1.22–3.19) | 1.89 (1.12–2.68) | 0.206 | Mann–Whitney U test |
| Preoperative triiodothyronine (T3) | 4.30 (3.65–4.81) | 4.46 (3.68–4.99) | 0.45 | Mann–Whitney U test |
| Preoperative thyroxine (T4) | 13.60 (11.07–15.30) | 13.95 (12.20–15.40) | 0.372 | Mann–Whitney U test |
| Preoperative adrenocorticotropic hormone (ACTH) | 31.60 (20.25–44.75) | 38.80 (23.18–56.75) | 0.032 | Mann–Whitney U test |
| Preoperative plasma cortisol (F) | 10.70 (6.88–13.94) | 10.40 (6.80–14.90) | 0.442 | Mann–Whitney U test |
| Preoperative estradiol (E2) | 58.18 (24.00–58.58) | 58.03 (23.25–58.38) | 0.53 | Mann–Whitney U test |
| Preoperative luteinizing hormone (LH) | 3.58 (1.98–6.63) | 5.11 (2.67–6.88) | 0.09 | Mann–Whitney U test |
| Preoperative follicle-stimulating hormone (FSH) | 6.88 (4.34–14.46) | 7.19 (4.35–15.42) | 0.829 | Mann–Whitney U test |
| Preoperative testosterone (T) | 1.12 (0.36–2.12) | 1.62 (0.55–2.37) | 0.185 | Mann–Whitney U test |
| Preoperative prolactin (PRL) | 18.80 (11.68–42.30) | 22.61 (11.15–50.66) | 0.961 | Mann–Whitney U test |
| Preoperative progesterone (P) | 0.47 (0.31–0.88) | 0.46 (0.29–0.72) | 0.864 | Mann–Whitney U test |
| Preoperative growth hormone (GH) | 0.43 (0.13–5.82) | 1.12 (0.27–6.12) | 0.046 | Mann–Whitney U test |
| Preoperative insulin-like growth factor 1 (IGF-1) | 123.00 (86.27–169.75) | 169.97 (100.00–203.00) | 0.005 | Mann–Whitney U test |
| Postoperative thyroid-stimulating hormone (TSH) | 0.81 (0.52–1.23) | 0.82 (0.54–1.44) | 0.532 | Mann–Whitney U test |
| Postoperative triiodothyronine (T3) | 3.08 (2.72–3.56) | 3.23 (2.85–3.68) | 0.239 | Mann–Whitney U test |
| Postoperative thyroxine (T4) | 16.80 (14.20–19.50) | 16.75 (15.00–19.65) | 0.458 | Mann–Whitney U test |
| Postoperative adrenocorticotropic hormone (ACTH) | 22.34 (14.95–36.02) | 26.35 (17.20–47.05) | 0.139 | Mann–Whitney U test |
| Postoperative plasma cortisol (F) | 17.17 (9.78–23.50) | 16.82 (12.31–23.20) | 0.819 | Mann–Whitney U test |
| Postoperative estradiol (E2) | 47.91 (23.75–48.41) | 47.86 (21.25–48.46) | 0.522 | Mann–Whitney U test |
| Postoperative luteinizing hormone (LH) | 3.46 (1.72–6.24) | 4.50 (2.39–6.58) | 0.079 | Mann–Whitney U test |
| Postoperative follicle-stimulating hormone (FSH) | 6.48 (4.17–10.56) | 7.17 (4.31–10.79) | 0.704 | Mann–Whitney U test |
| Postoperative testosterone (T) | 0.76 (0.47–1.06) | 0.70 (0.44–1.08) | 0.996 | Mann–Whitney U test |
| Postoperative prolactin (PRL) | 5.80 (3.37–13.23) | 5.28 (3.26–12.14) | 0.728 | Mann–Whitney U test |
| Postoperative progesterone (P) | 0.90 (0.54–1.51) | 0.77 (0.43–1.45) | 0.283 | Mann–Whitney U test |
| Postoperative growth hormone (GH) | 0.58 (0.31–1.17) | 0.72 (0.42–1.79) | 0.088 | Mann–Whitney U test |
| Postoperative insulin-like growth factor 1 (IGF-1) | 128.50 (90.12–184.50) | 156.00 (103.50–263.75) | 0.014 | Mann–Whitney U test |

Note.

Hormone levels are presented as median (IQR). Preoperative values were obtained within 7 days before surgery, and postoperative values were obtained on postoperative day 1. Group comparisons (SOX2− vs SOX2+) were performed using two-sided Mann–Whitney U tests (as shown in the “Statistical test” column).

Supplementary Table 9

|  | Age | Sex | Hormone_type | Lineage_type | SOX-2 | CK8/18 | Ki-67(%) |
| --- | --- | --- | --- | --- | --- | --- | --- |
| 1 | 53 | Male | Non-functioning | SF1-only | Negative | Densely granulated | 3 |
| 2 | 65 | Female | Gonadotroph | SF1-only | Negative | Densely granulated | 2 |
| 3 | 38 | Female | Non-functioning | SF1-only | Negative | Negative | 2 |
| 4 | 57 | Male | Non-functioning | TF-negative | Negative | Densely granulated | 5 |
| 5 | 58 | Male | Gonadotroph | SF1-only | Negative | Negative | 3 |
| 6 | 47 | Female | Non-functioning | TF-negative | Negative | Negative | 2 |
| 7 | 27 | Male | Non-functioning | TF-negative | Negative | Negative | 2 |
| 8 | 31 | Male | PRL | PIT1-only | Positive | Densely granulated | 3 |
| 9 | 63 | Female | Plurihormonal-other | PIT1-only | Negative | Negative | 3 |
| 10 | 69 | Male | ACTH | TPIT-only | Negative | Densely granulated | 2 |
| 11 | 69 | Male | Non-functioning | TF-negative | Positive | Negative | 7 |
| 12 | 57 | Female | Non-functioning | TPIT-only | Positive | Densely granulated | 3 |
| 13 | 38 | Female | Non-functioning | TPIT-only | Negative | Densely granulated | 2 |
| 14 | 13 | Male | PRL | PIT1-only | Negative | Negative | 3 |
| 15 | 55 | Female | TSH | PIT1-only | Negative | Negative | 3 |
| 16 | 56 | Female | Non-functioning | SF1-only | Negative | Densely granulated | 2 |
| 17 | 32 | Male | Non-functioning | SF1-only | Negative | Negative | 3 |
| 18 | 52 | Male | Non-functioning | SF1-only | Negative | Negative | 1 |
| 19 | 58 | Female | GH | PIT1+SF1 | Negative | Sparsely granulated | 2 |
| 20 | 40 | Female | Non-functioning | TPIT-only | Positive | Densely granulated | 3 |

*Note.*

De-identified case-level information for recurrent PitNETs is provided, including age (years), sex (Female/Male), hormone subtype (hormone_type), TF-defined lineage category (lineage_type), SOX2 immunohistochemistry status (positive/negative; criteria as described in Methods), granulation pattern assessed by CK8/18 immunohistochemistry (densely granulated, sparsely granulated, or negative), and Ki-67 labeling index (%).
